# Supplementary material for: Low stromal Foxp3+ regulatory T-cell density is associated with complete response to neoadjuvant chemoradiotherapy in rectal cancer
Source: PubMed Central journal article supplement — Br J Cancer. 2015 Dec 8;113(12):1677–86. doi: 10.1038/bjc.2015.427 (PMC4702002; doi:10.1038/bjc.2015.427), 2015-12-08
Supplement: bjc2015427x1.pdf [file bjc2015427x1.pdf]

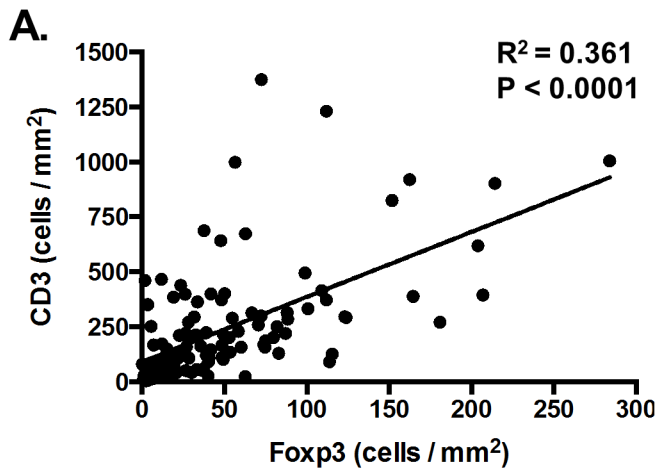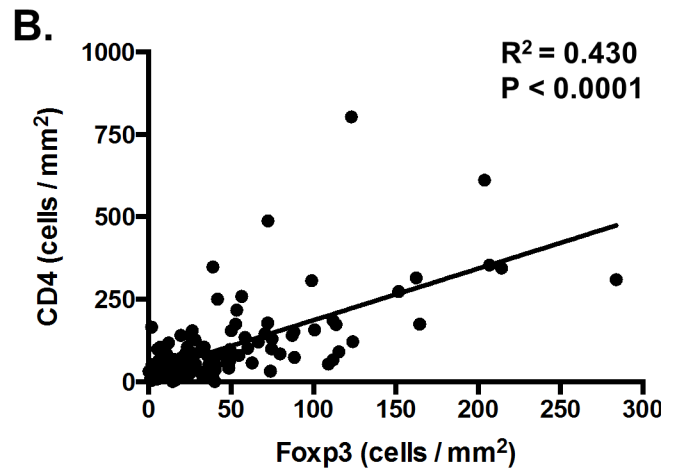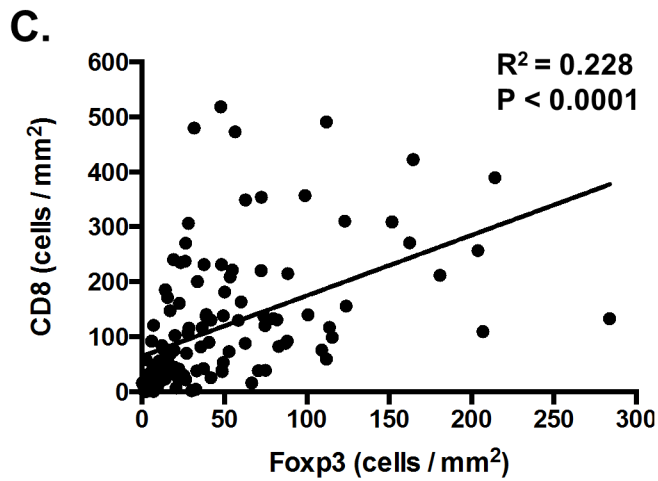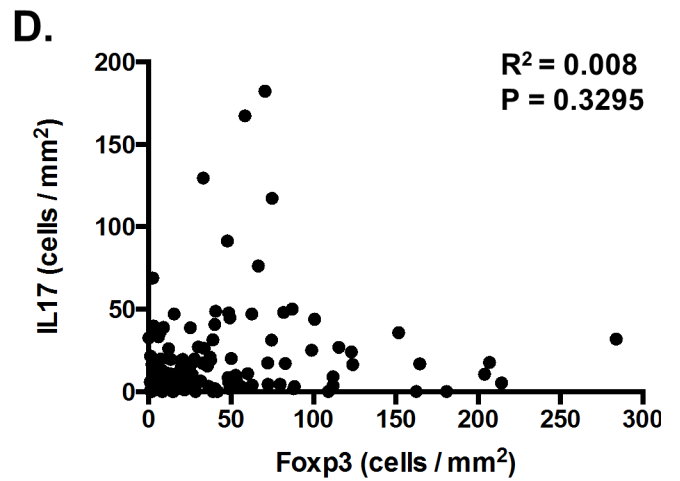

**Supplementary Figure 1. Correlation between stromal T cell subsets.** Linear regression of stromal Foxp3<sup>+</sup> cell density *versus* (A) total T cells, (B) CD4<sup>+</sup> T cells, (C) CD8<sup>+</sup> T cells and (D) IL-17<sup>+</sup> cells.
