# Supplementary material for: Low stromal Foxp3+ regulatory T-cell density is associated with complete response to neoadjuvant chemoradiotherapy in rectal cancer
Source: PubMed Central journal article supplement — Br J Cancer. 2015 Dec 8;113(12):1677–86. doi: 10.1038/bjc.2015.427 (PMC4702002; doi:10.1038/bjc.2015.427), 2015-12-08
Supplement: bjc2015427x2.pdf [file bjc2015427x2.pdf]

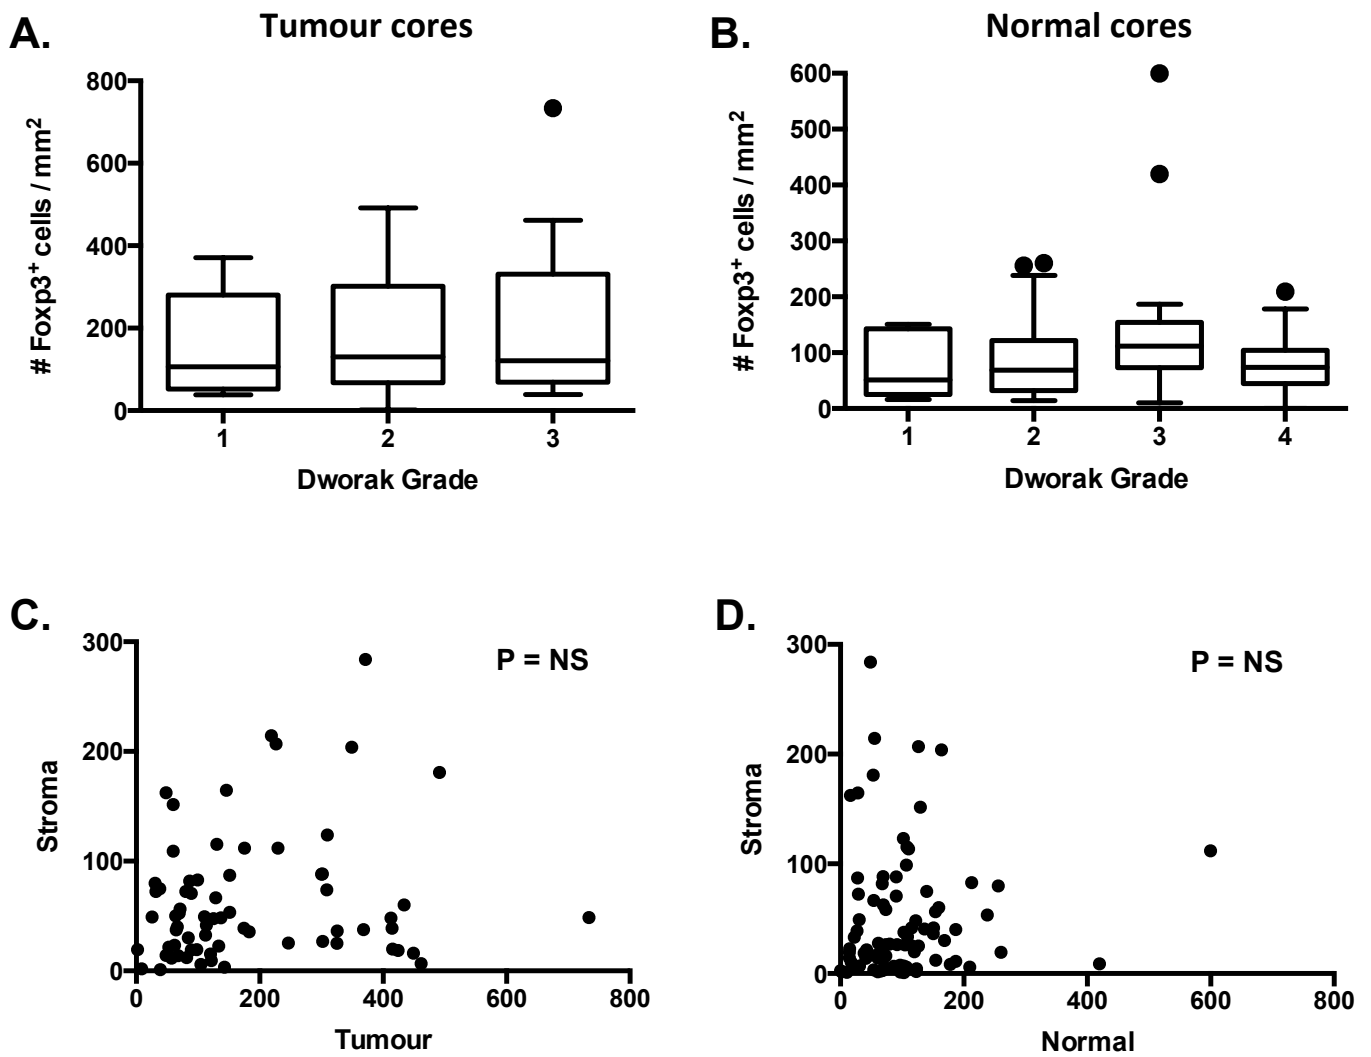

**Supplementary Figure 2. (A and B)** Foxp3<sup>+</sup> cell density in tumour and normal cores by Dworak grade (P = NS; general linear model). Circles represent outliers using the Tukey method (> the 75<sup>th</sup> percentile plus 1.5 times the interquartile range). **(C and D)** Linear regression of Foxp3<sup>+</sup> cell density (cells / mm<sup>2</sup>) in stromal versus tumour and normal cores.
